# Supplementary material
Source: Copernicus journal article supplement (doi:10.5194/hess-30-3331-2026)
Supplement: Supplementary file 1 [file hess-30-3331-2026-supplement.pdf]

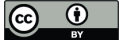

*Supplement of*

## **Can streamflow observations constrain snow mass reconstructions? Lessons from two synthetic numerical experiments**

**Pau Wiersma et al.**

*Correspondence to:* Pau Wiersma ([pau.wiersma@unil.ch](mailto:pau.wiersma@unil.ch))

The copyright of individual parts of the supplement might differ from the article licence.

# S1. Streamflow and SWE performance metrics

Below figures show the equivalent of figure 4 for all other retained SWE performance metrics. The streamflow results shown in figures 4a and 4c are omitted, only the FS and SS SWE performance metric results are shown.

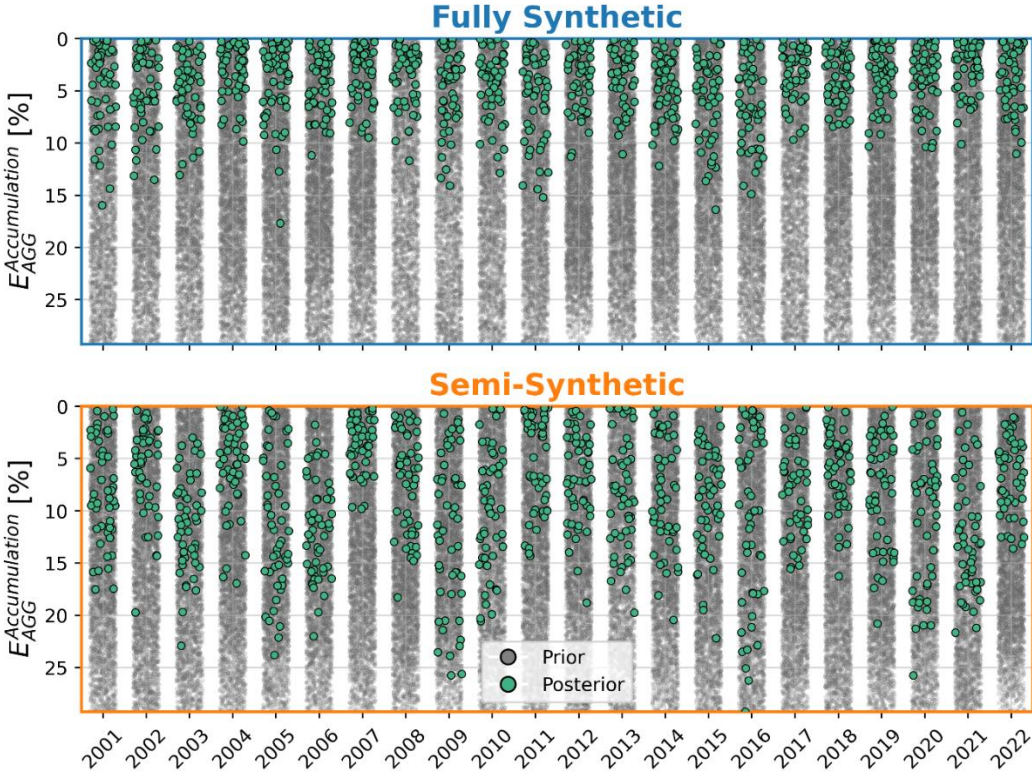

Figure S1

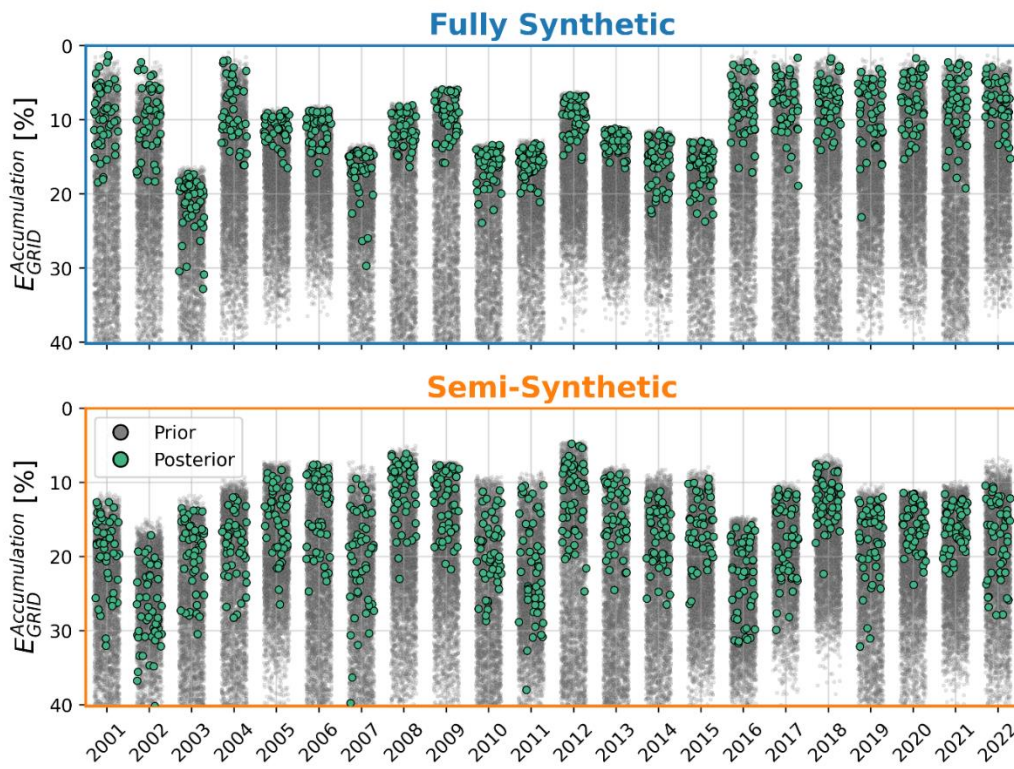

Figure S2

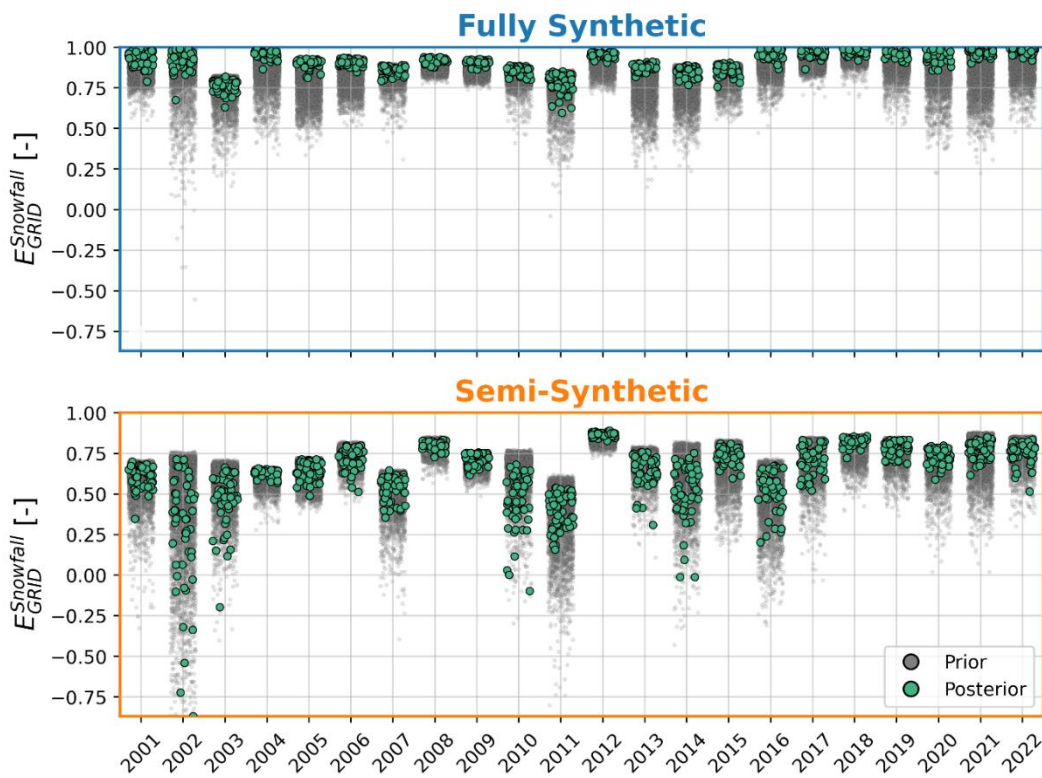

Figure S3

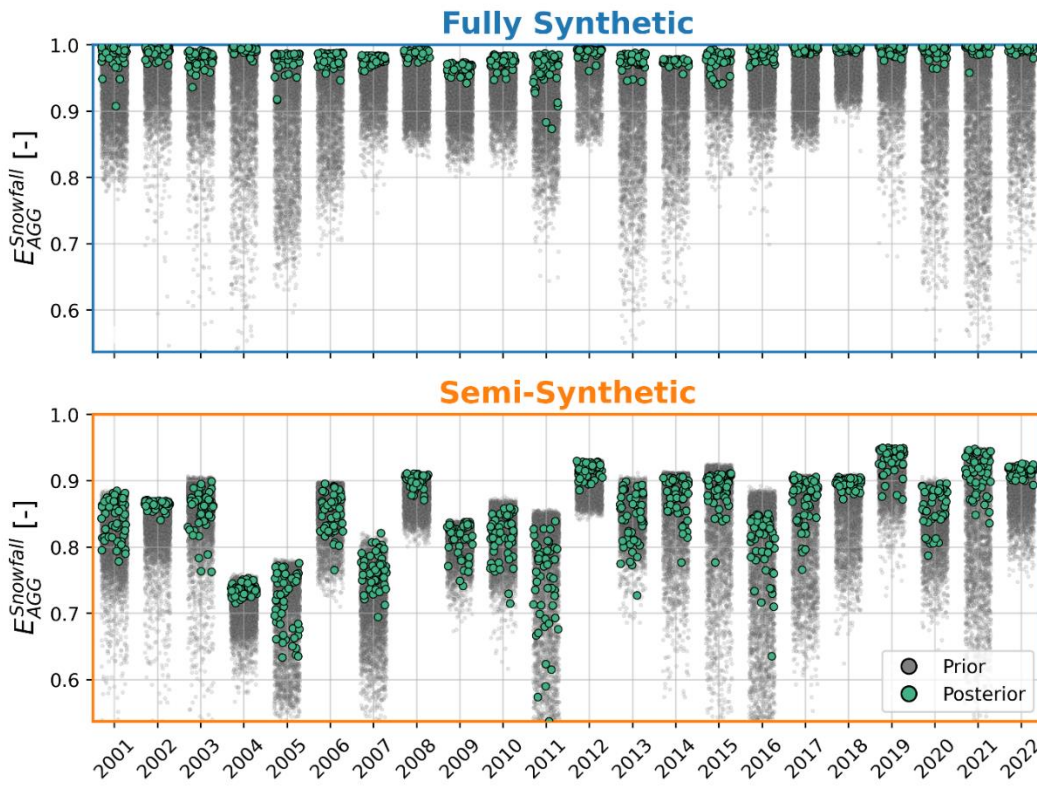

Figure S4

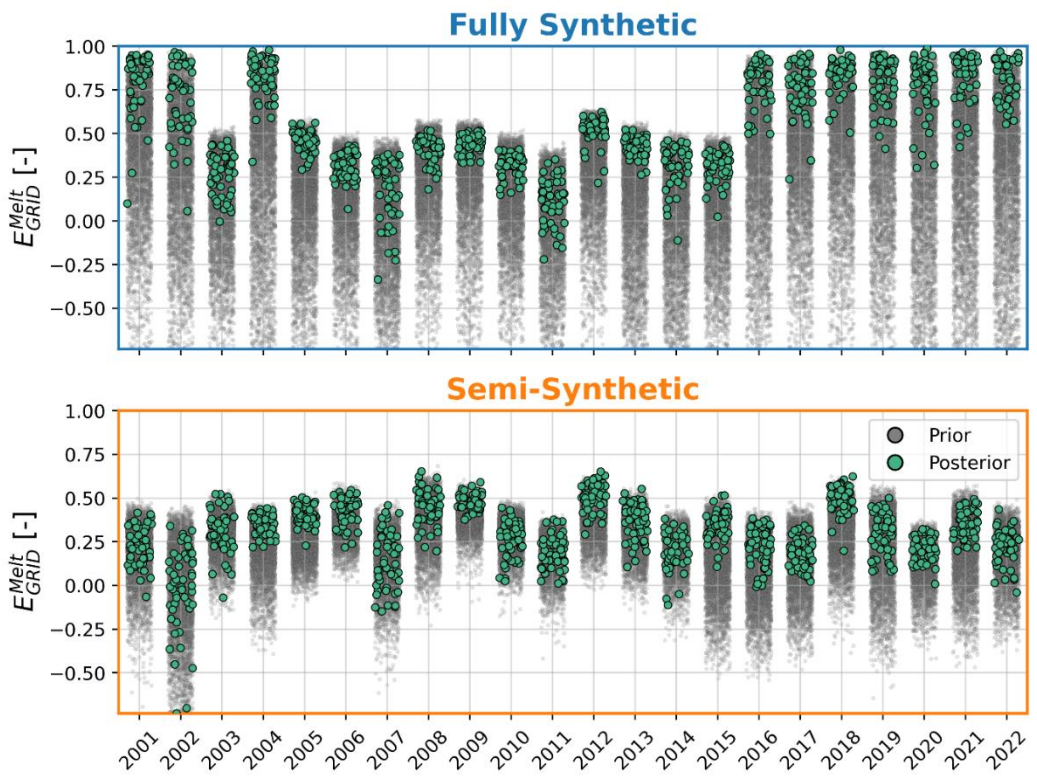

Figure S5

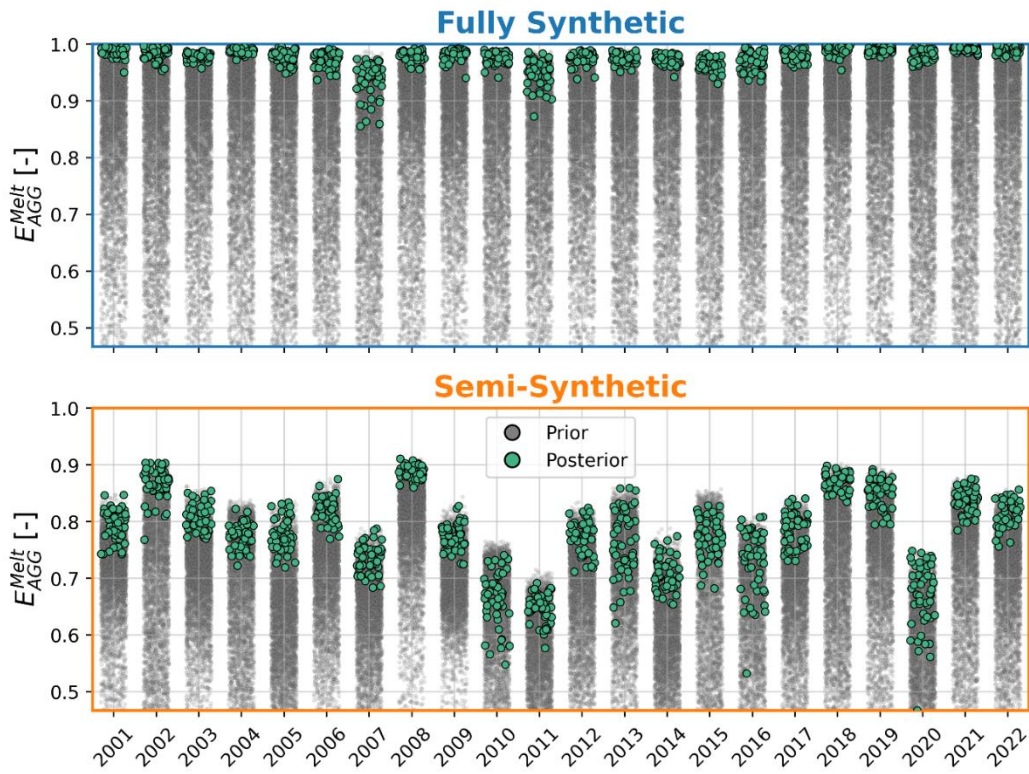

Figure S6

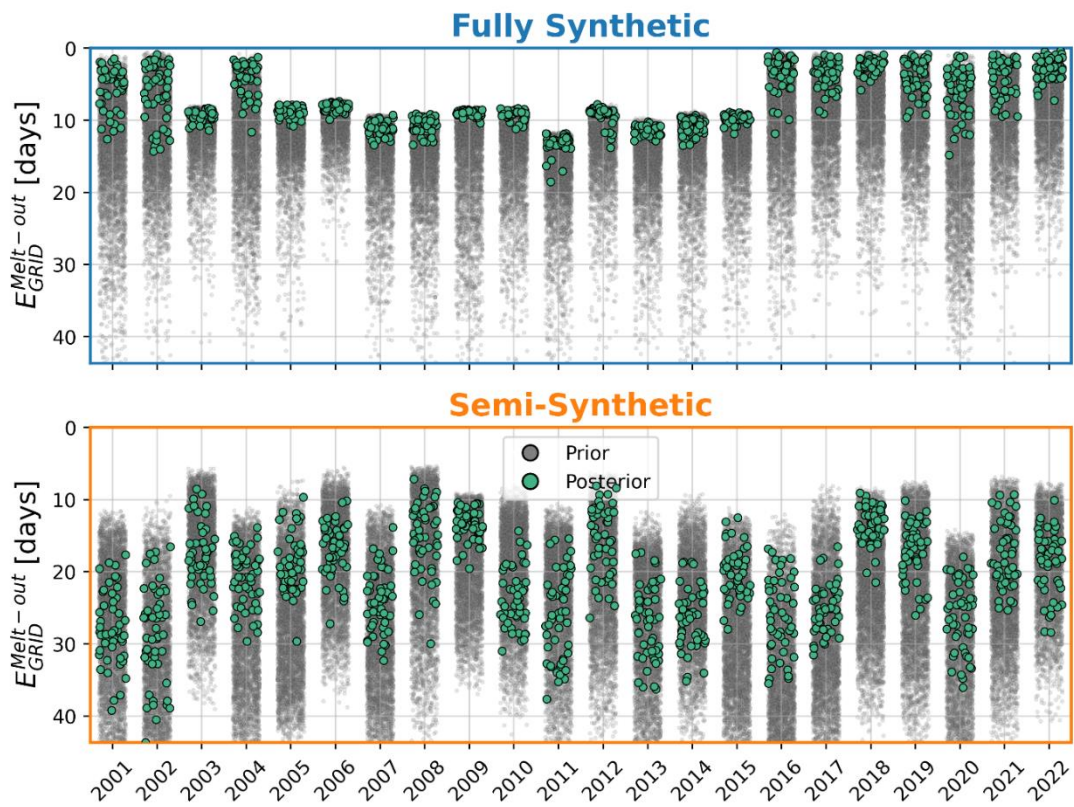

Figure S7

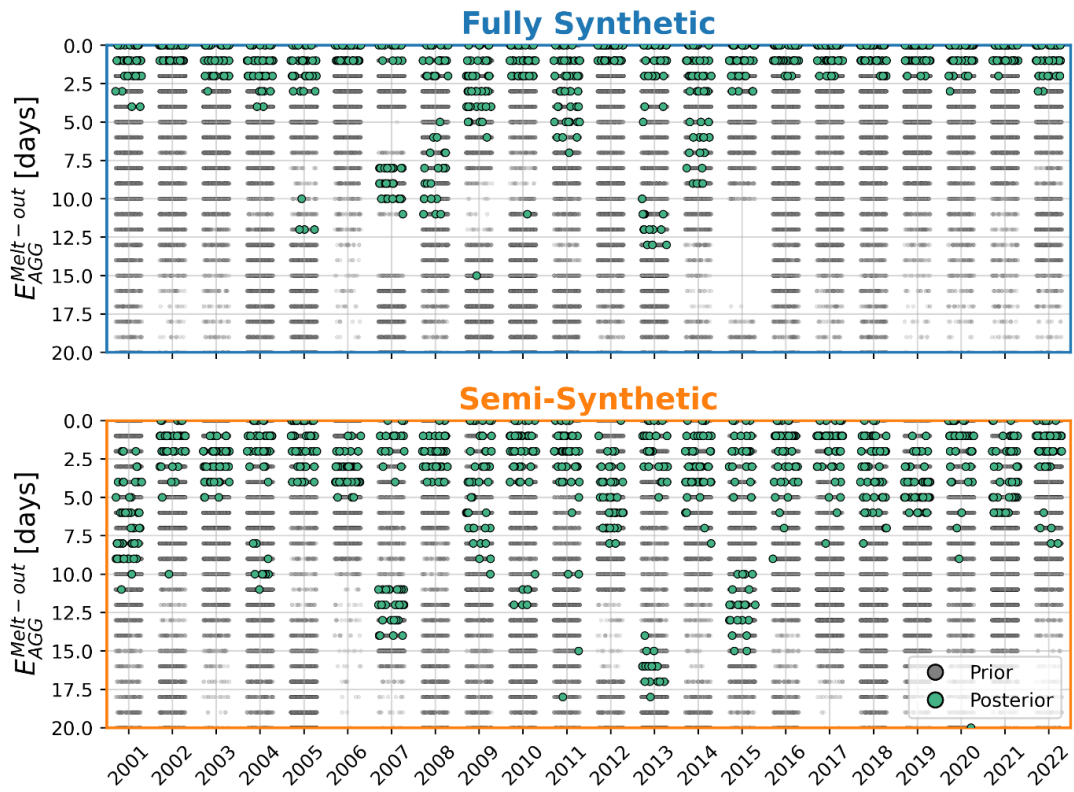

Figure S8

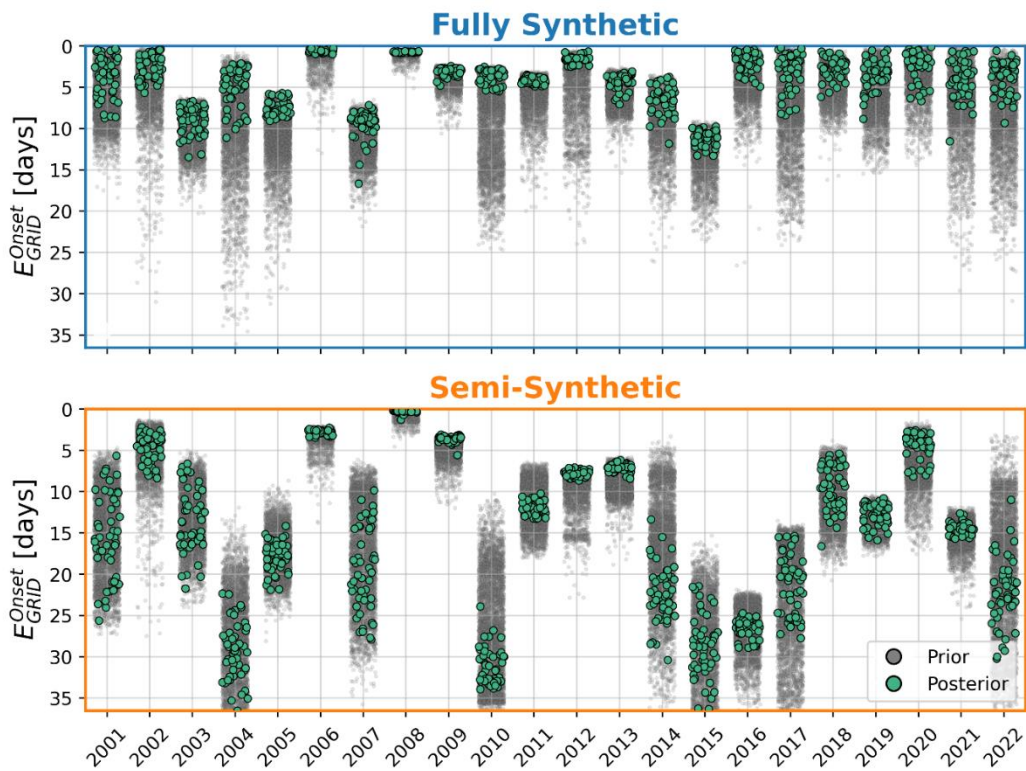

Figure S9

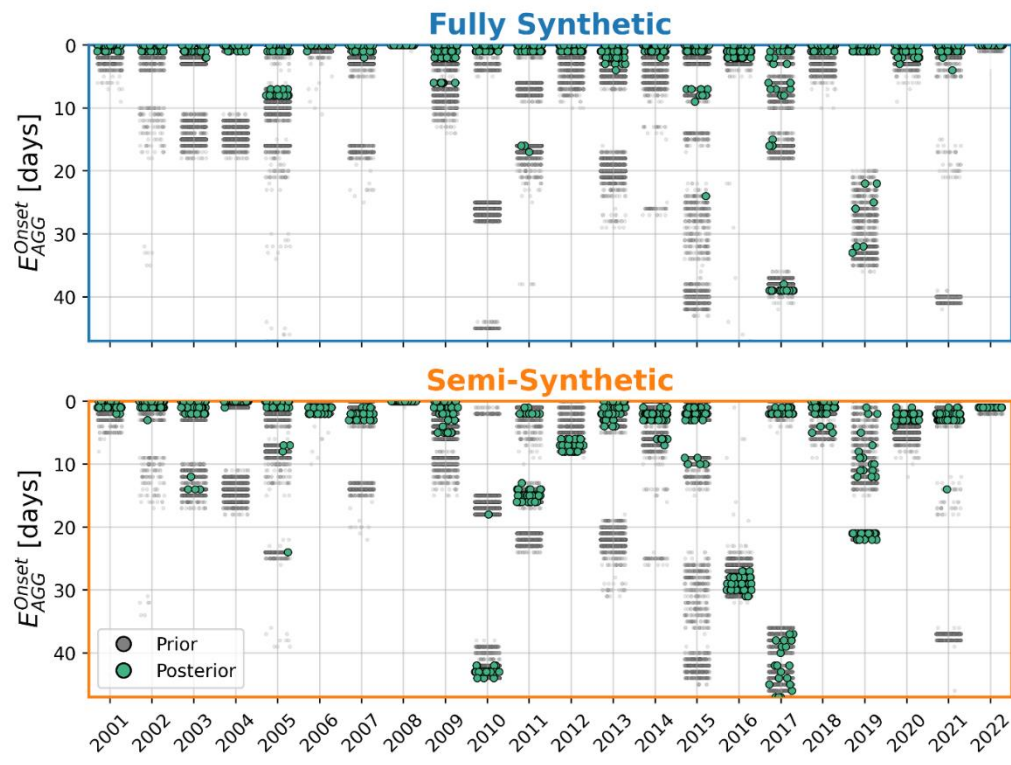

Figure S10
